# Supplementary material for: Pd anchored on C3N4nanosheets/reduced graphene oxide: an efficient catalyst for the transfer hydrogenation of alkenes
Source: Royal Society of Chemistry journal article supplement (doi:10.1039/c8nj00947c), 2018-01-01
Supplement: c8nj00947c1.pdf [file c8nj00947c1.pdf]

**Pd anchored on C<sub>3</sub>N<sub>4</sub> nanosheets/ reduced graphene oxide: an efficient  
catalyst for the transfer hydrogenation of alkenes**

Jie Li<sup>‡</sup>, Saisai Cheng<sup>‡</sup>, Tianxing Du, Ningzhao Shang<sup>\*</sup>, Shutao Gao, Cheng Feng, Chun Wang<sup>\*</sup>,

Zhi Wang

College of Science, Hebei Agricultural University, Baoding 071001, China

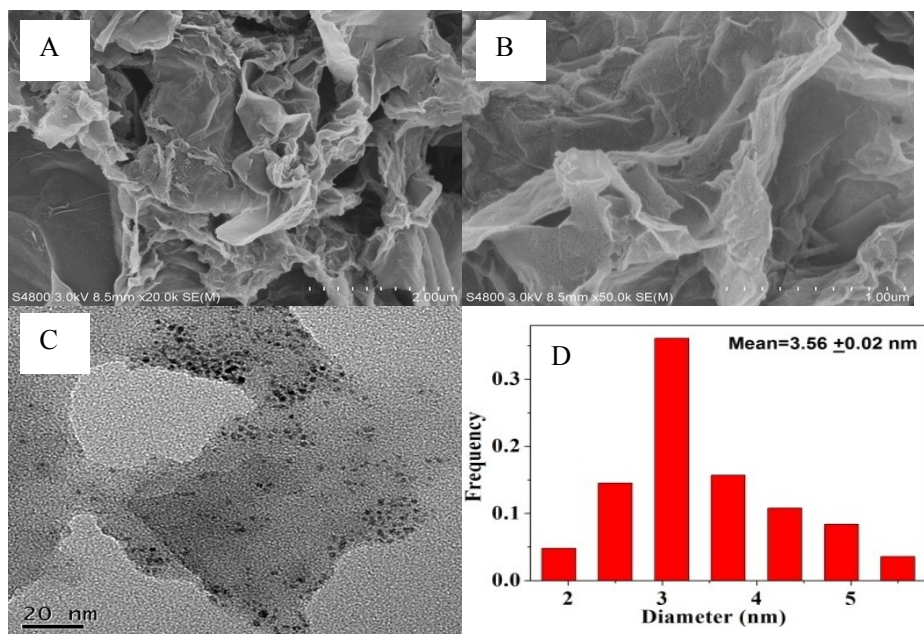

**Fig. S1** The SEM images of g-C<sub>3</sub>N<sub>4</sub> NS/rGO<sub>20</sub> (A, B), the TEM image of the synthesized Pd-g-C<sub>3</sub>N<sub>4</sub> NS (B) and Pd particle-size distribution in the Pd-g-C<sub>3</sub>N<sub>4</sub> NS (D).

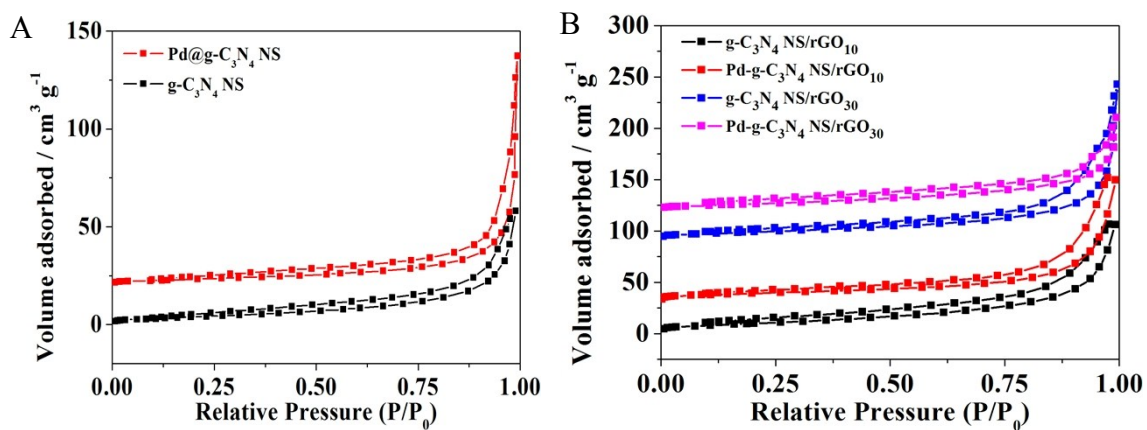

**Fig. S2** The nitrogen adsorption-desorption isotherms of g-C<sub>3</sub>N<sub>4</sub> NS, Pd-g-C<sub>3</sub>N<sub>4</sub> NS (A) and g-C<sub>3</sub>N<sub>4</sub> NS/rGO<sub>10</sub>, g-C<sub>3</sub>N<sub>4</sub> NS/rGO<sub>30</sub>, Pd-g-C<sub>3</sub>N<sub>4</sub> NS/rGO<sub>10</sub>, Pd-g-C<sub>3</sub>N<sub>4</sub> NS/rGO<sub>30</sub> (B).

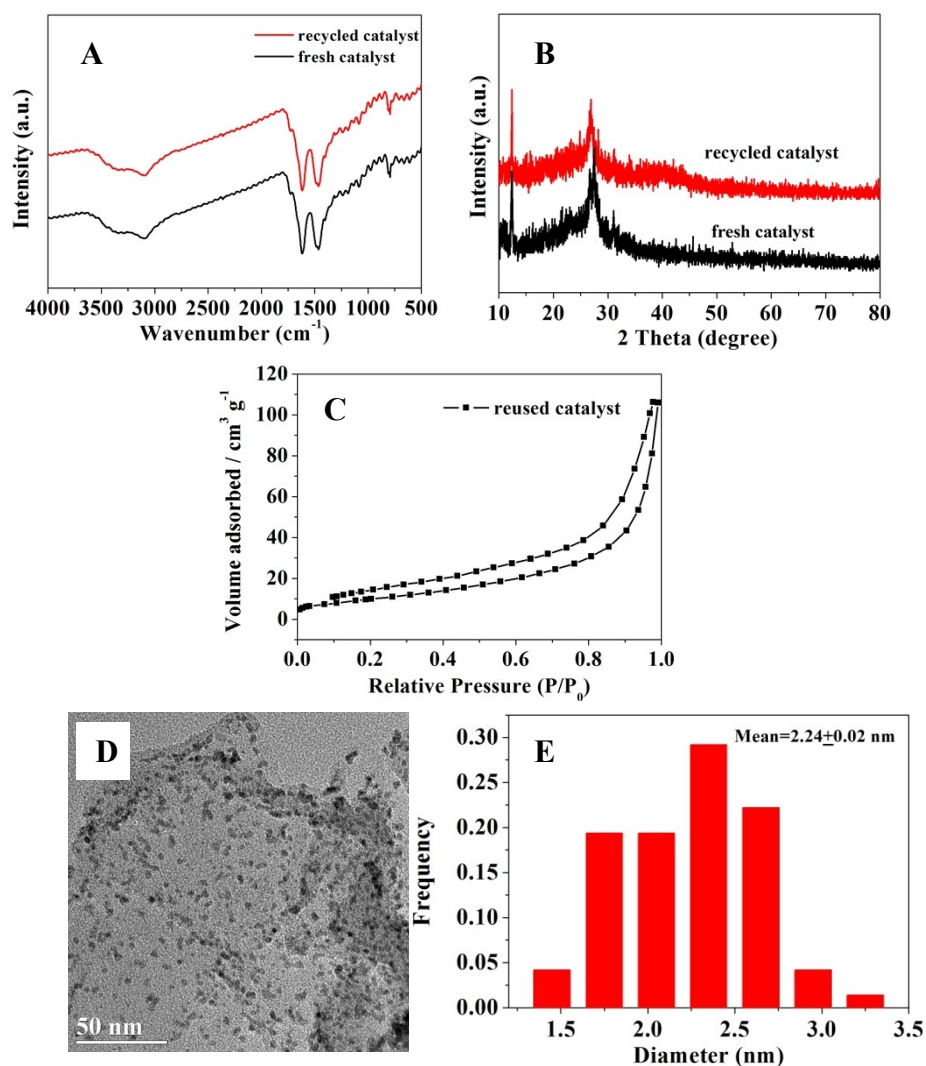

**Fig. S3** FT-IR spectra (A) and the XRD pattern (B) and the nitrogen adsorption-desorption isotherms (C) and the TEM image (D) and the Pd particle-size distribution (E) of the reused Pd-g-C<sub>3</sub>N<sub>4</sub> NS/rGO<sub>20</sub> catalyst.

**Table S1** Various reported catalyst tested for hydrogenation of alkenes.

| Entry | Catalyst                                          | Hydrogen source                                 | Solvent          | Tem (°C) | Time (h) | TOF (h <sup>-1</sup> ) | Reference |
|-------|---------------------------------------------------|-------------------------------------------------|------------------|----------|----------|------------------------|-----------|
| 1     | Pd/CN                                             | HCOOH                                           | H <sub>2</sub> O | 25       | 0.25-3   | 4-53                   | 1         |
| 2     | Pd@CN <sup>[a]</sup>                              | HCOOH                                           | -                | 90       | 12       | 3.2-3.8                | 2         |
| 3     | Fe <sub>3</sub> O <sub>4</sub> @GO                | N <sub>2</sub> H <sub>4</sub> ·H <sub>2</sub> O | EtOH             | 80       | 4-20     | 0.7-3                  | 3         |
| 4     | Pd@POP                                            | HCOOH:Et <sub>3</sub> N                         | EtOH             | 25       | 4-15     | 4-17                   | 4         |
| 5     | Al <sub>2</sub> (BDC) <sub>3</sub> <sup>[a]</sup> | N <sub>2</sub> H <sub>4</sub> ·H <sub>2</sub> O | MeCN             | 25       | 24       | 0.07                   | 5         |

|    |                                                         |                                                 |      |     |        |                |           |
|----|---------------------------------------------------------|-------------------------------------------------|------|-----|--------|----------------|-----------|
| 6  | Cu <sub>3</sub> (BTC) <sub>2</sub> <sup>[b]</sup>       | N <sub>2</sub> H <sub>4</sub> ·H <sub>2</sub> O | MeCN | 25  | 24     | 0.04           | 5         |
| 7  | Cu(0)@UiO-66-NH <sub>2</sub>                            | N <sub>2</sub> H <sub>4</sub> ·H <sub>2</sub> O | EtOH | 25  | 0.25   | 100            | 6         |
| 8  | HKUST-1 <sup>[c]</sup>                                  | N <sub>2</sub> H <sub>4</sub> ·H <sub>2</sub> O | MeCN | 25  | 24     | 1.1            | 7         |
| 9  | MIL-53 (Al)                                             | N <sub>2</sub> H <sub>4</sub> ·H <sub>2</sub> O | MeCN | 25  | 24     | 0.74           | 7         |
| 10 | Monarch-1300<br>Carbon                                  | N <sub>2</sub> H <sub>4</sub>                   | THF  | 40  | 24     | 65-95(Conv. %) | 8         |
| 11 | cobalt catalyst                                         | i-PrOH                                          | THF  | 100 | 24     | 0.005-0.02     | 9         |
| 12 | Pd-g-C <sub>3</sub> N <sub>4</sub> NS/rGO <sub>20</sub> | HCOOH:HCOONH <sub>4</sub>                       | EtOH | 30  | 0.25-4 | 9-133          | This work |

[a] Pd@CN = (Pd)-supported Nitrogen-doped carbon catalyst

[b] BDC= *p*-benzenedicarboxylate

[c] BTC=1,3,5-benzenetricarboxylate

[d] HKUST-1=MOF-199

## References

1. L.-H. Gong, Y.-Y. Cai, X.-H. Li, Y.-N. Zhang, J. Su and J.-S. Chen, *Green Chem.*, 2014, **16**, 3746-3751.
2. C. Zhang, Y. Leng, P. Jiang, J. Li and S. Du, *ChemistrySelect*, 2017, **2**, 5469-5474.
3. J. Mondal, K. T. Nguyen, A. Jana, K. Kurniawan, P. Borah, Y. Zhao and A. Bhaumik, *Chem. Commun.*, 2014, **50**, 12095-12097.
4. J. Mondal, Q. T. Trinh, A. Jana, W. K. Ng, P. Borah, H. Hirao and Y. Zhao, *ACS Appl. Mater. Interfaces*, 2016, **8**, 15307-15319.
5. A. Dhakshinamoorthy, M. Alvaro and H. Garcia, *Adv. Synth. Catal.*, 2009, **351**, 2271-2276.
6. J. C. Wang, Y. H. Hu, G. J. Chen and Y. B. Dong, *Chem. Commun.*, 2016, **52**, 13116-13119.
7. P. Garcíagarcía, M. Müller and A. Corma, *Chem. Sci.*, 2014, **5**, 2979-3007.
8. A. T. Murray and Y. Surendranath, *ACS Catal.*, 2017, **7**, 3307-3312.
9. G. Zhang, Z. Yin and J. Tan, *RSC Adv.*, 2016, **6**, 22419-22423.
